## **Assessing the contribution of rare-to-common protein-coding variants to circulating metabolic biomarker levels via 412,394 UK Biobank exome sequences**

Abhishek Nag<sup>1</sup>, Lawrence Middleton<sup>1</sup>, Ryan S. Dhindsa<sup>2,3</sup>, Dimitrios Vitsios<sup>1</sup>, Eleanor Wigmore<sup>1</sup>, Erik L. Allman<sup>1</sup>, Anna Reznichenko<sup>4</sup>, Keren Carss<sup>1</sup>, Katherine R. Smith<sup>1</sup>, Quanli Wang<sup>2</sup>, Benjamin Challis<sup>4</sup>, Dirk S. Paul<sup>1</sup>, Andrew R. Harper<sup>1</sup>, Slavé Petrovski<sup>1</sup>

<sup>1</sup>Centre for Genomics Research, Discovery Sciences, BioPharmaceuticals R&D, AstraZeneca, Cambridge, UK

<sup>2</sup>Centre for Genomics Research, Discovery Sciences, BioPharmaceuticals R&D, AstraZeneca, Waltham, USA

<sup>3</sup>Department of Molecular and Human Genetics, Baylor College of Medicine and Jan and Dan Duncan Neurological Research Institute at Texas Children's Hospital, Houston, TX 77030, USA

<sup>4</sup>Translational Science and Experimental Medicine, Research and Early Development, Cardiovascular, Renal and Metabolism (CVRM), BioPharmaceuticals R&D, AstraZeneca, Gothenburg, Sweden

### **Corresponding author:**

Slavé Petrovski

Vice-President, Centre for Genomics Research,

Discovery Sciences, BioPharmaceuticals R&D

AstraZeneca

Cambridge

United Kingdom

NOTE: This preprint reports new research that has not been certified by peer review and should not be used to guide clinical practice.  
Email: [slav.petrovski@astrazeneca.com](mailto:slav.petrovski@astrazeneca.com)

1 **Abstract**

2  
3 Genome-wide association studies have established the contribution of common and low  
4 frequency variants to metabolic biomarkers in the UK Biobank (UKB); however, the role of  
5 rare variants remains to be assessed systematically. We evaluated rare coding variants for  
6 198 metabolic biomarkers, including metabolites assayed by Nightingale Health, using  
7 exome sequencing in participants from four genetically diverse ancestries in the UKB  
8 (N=412,394). Gene-level collapsing analysis – that evaluated a range of genetic  
9 architectures – identified a total of 1,303 significant relationships between genes and  
10 metabolic biomarkers ( $p < 1 \times 10^{-8}$ ), encompassing 207 distinct genes. These include  
11 associations between rare non-synonymous variants in *GIGYF1* and glucose and lipid  
12 biomarkers, *SYT7* and creatinine, and others, which may provide insights into novel disease  
13 biology. Comparing to a previous microarray-based genotyping study in the same cohort, we  
14 observed that 40% of gene-biomarker relationships identified in the collapsing analysis were  
15 novel. Finally, we applied Gene-SCOUT, a novel tool that utilises the gene-biomarker  
16 association statistics from the collapsing analysis to identify genes having similar biomarker  
17 fingerprints and thus expand our understanding of gene networks.

## 18 **Introduction**

19 Metabolic blood biomarkers represent intermediate or end products of biochemical pathways  
20 that can be used to diagnose and monitor human disease. The application of metabolic  
21 biomarkers as intermediate traits to dissect the genetic basis of complex human diseases is  
22 well-established. Investigating the genetic underpinnings of blood biomarkers can offer novel  
23 insights into human disease mechanisms and, in turn, provide potential therapeutic targets.  
24 Large-scale genome-wide association studies (GWAS) have so far identified hundreds of  
25 genetic loci that regulate blood biomarker and metabolite levels<sup>1-11</sup>; however, difficulty in  
26 mapping these loci to causal genes and interpreting functional effects of non-coding variants  
27 have stymied the clinical impact for many of these associations<sup>12</sup>.

28  
29 The UK Biobank (UKB)<sup>13</sup> is a large population-based resource of ~500,000 participants with  
30 genetic data linked to a diverse set of phenotypic measurements. Genotype data from  
31 microarrays and large population-based imputation panels have helped establish the  
32 contribution of common and low frequency variants towards blood biomarkers in the UKB<sup>14</sup>.  
33 The availability of exome sequences in the same population now allows for the exploration of  
34 rare coding variants regulating metabolic blood biomarkers. Associations for rare coding  
35 variants have demonstrably greater translational potential given their larger effect sizes<sup>15</sup>  
36 and our ability to more directly interpret their functional impact<sup>16</sup>.

37  
38 Using exome sequences from 412,394 unrelated participants across multiple genetic  
39 ancestries in the UKB, we present findings of variant-level and gene-level (collapsing)  
40 association tests for 198 metabolic blood biomarkers. We then introduce a novel tool, Gene-  
41 SCOUT, that utilises this rich catalogue of gene-biomarker association statistics to identify  
42 genes with similar biomarker fingerprints as a given (target) gene of interest and expand our  
43 understanding of gene networks.

## 44 Results

45 In this study, we analysed 198 metabolic blood biomarkers, including 30 clinical blood  
46 biomarkers related to glucose and lipid metabolism, renal and liver function (**Table S1A**),  
47 and an additional 168 Nightingale assay blood metabolite measurements related to  
48 lipoprotein lipids, fatty acids and their compositions, and various other low-molecular weight  
49 metabolites<sup>17</sup> (**Table S1B**). Most of the metabolic biomarkers pertain to lipid metabolism  
50 (77%) and correlate highly with each other (**Figure 2a**). Many metabolic biomarkers also  
51 demonstrate strong associations with clinical traits documented in the UKB (**Figure 2b**).

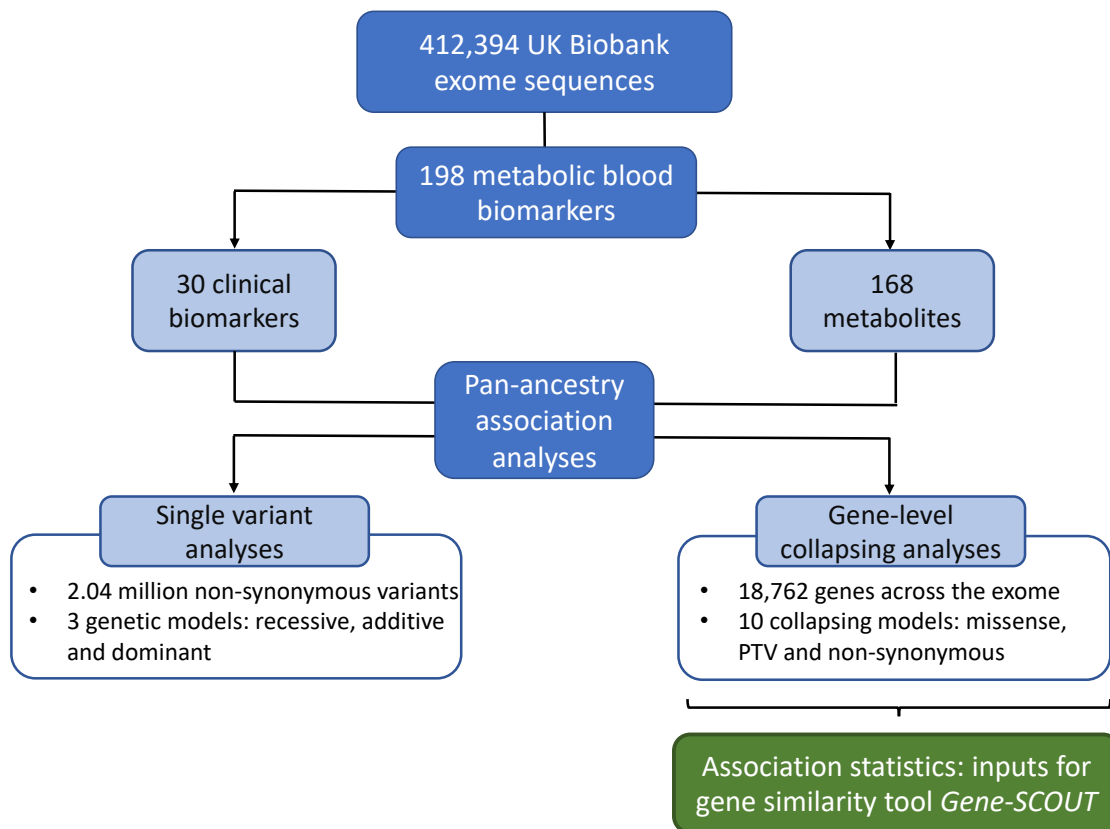

52  
53 **Figure 1: A schematic of the association analyses that were conducted for the**  
54 **metabolic blood biomarkers using the UK Biobank exome sequences**

55 The UK Biobank exome sequences were used to conduct single variant (under 3 genetic models) and  
56 gene-level (under 10 collapsing models) association analyses for the clinical blood biomarkers (N=30)  
57 and blood metabolite measurements (N=168). The gene-level association statistics for these  
58 metabolic biomarkers were used as inputs for the gene similarity tool *Gene-SCOUT*.

59  
60 We first conducted a single variant analysis between the non-synonymous coding  
61 variants (N=2,043,019 for the European ancestry subset) and the 198 metabolic biomarkers  
62 (**Figure 1**). Excluding the MHC region, 19,351 significant variant-biomarker associations

63 ( $p < 1 \times 10^{-8}$ ) were identified in the European subset of UK Biobank, which mapped to 12,217  
 64 significant relationships between genes and biomarkers (**Tables S2A, S2B**). Pruning  
 65 variants in linkage disequilibrium ( $r^2$  threshold of 0.5) resulted in 9,738 significant gene-  
 66 biomarker relationships. Notably, 243 distinct PTVs accounted for 1,366 significant  
 67 associations, of which 602 (44%) were attributable to rare PTVs (MAF < 0.1%) with large  
 68 effect sizes (>0.5 SD) (**Figure 4a**) (**Tables S3A, S3B**). We identified 28 PTVs with MAF as  
 69 low as 0.001% that achieved significance in the ExWAS: these include associations relating  
 70 to several well-established and biologically plausible relationships such as *GOT1* and  
 71 aspartate aminotransferase, *CST3* and cystatin C, *APOB* and cholesterol biomarkers, *ALPL*  
 72 and alkaline phosphatase (**Table S3A**). Among other PTV findings that may provide new  
 73 insights into important biology, a rare frameshift variant (MAF=0.03%) in *PLIN1* – a gene  
 74 known to cause familial lipodystrophy<sup>18</sup> – was associated with HDL-cholesterol (beta=0.40  
 75 [0.27,0.53],  $p = 1.6 \times 10^{-9}$ ), and a rare splice variant (MAF=0.09%) in *TNFRSF10B* – loss of  
 76 which has been reported to promote survival of virus-infected liver cells<sup>19</sup> – was associated  
 77 with gamma glutamyltransferase (beta=0.21 [0.14,0.28],  $p = 3.8 \times 10^{-9}$ ) (**Table S3A**).

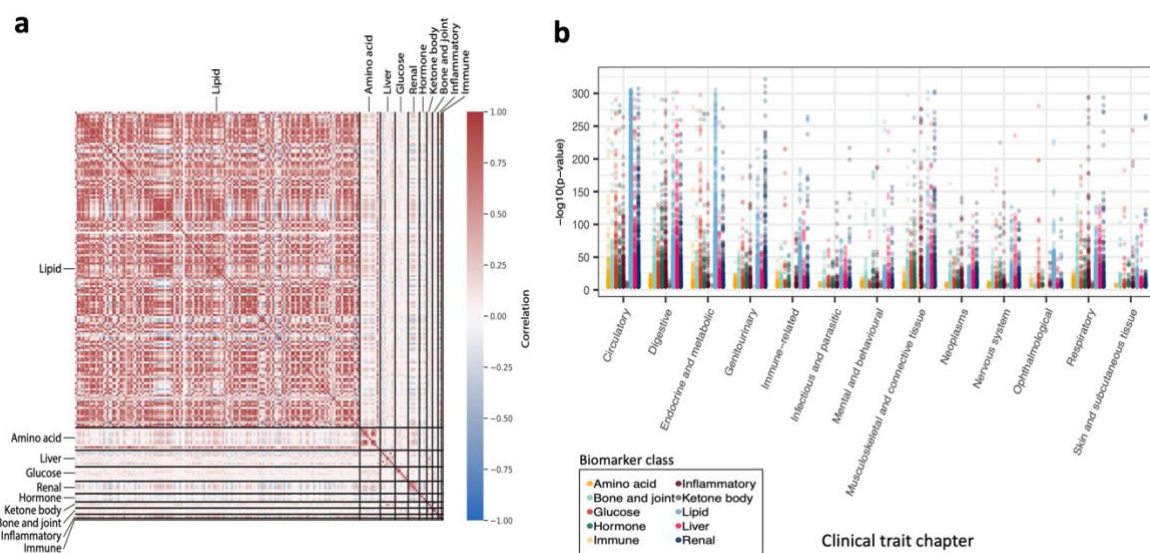

78  
 79 **Figure 2: Characteristics of metabolic blood biomarkers analysed in this study**  
 80 The 198 metabolic blood biomarkers analysed in this study were grouped into the following 10  
 81 biological classes: lipid, amino acid, liver, glucose, renal, hormone, ketone body, bone and joint,  
 82 inflammatory, and immune. (a) The plot demonstrates that metabolic biomarkers belonging to the  
 83 same biological class are correlated with each other. (b) Strong associations (plotted on the Y-axis)  
 84 were observed between the metabolic biomarkers and 15,719 clinical traits (grouped by chapter)  
 85 documented in the UKB<sup>20</sup>.

86           Next, we performed a gene-level collapsing analysis that tests the aggregate effect of  
87 rare functional variants in each gene. We employed 10 different models to capture a diverse  
88 range of genetic architectures (**Methods**). In the analysis involving individuals of European  
89 ancestry alone, we identified 1,303 significant relationships between genes and metabolic  
90 biomarkers ( $p < 1 \times 10^{-8}$ ) (**Tables S4A, S4B; Figures 3a, 3b**). Most (68%, 880/1,303) gene-  
91 biomarker relationships detected via the collapsing analysis were captured through models  
92 that exclusively focused on PTV classes (“ptv” and “ptv5pct”), while the remaining 32%  
93 were attributable to models that incorporated missense variants. We detected more  
94 significant associations using our “ptv” and “ptv5pct” models than a prior study<sup>21</sup> that also  
95 performed gene-level collapsing analysis using the UKB exome sequence data, albeit with a  
96 different analytical framework. For instance, associations between PTVs in 12 genes and  
97 HbA1c that we detected were not reported in the other study: this includes the glucose  
98 metabolism genes *HK1* and *G6PC2* (**Figure S1**). We also extended our gene-level  
99 collapsing analysis to include all ancestral groups in the UKB (**Methods**). This detected an  
100 additional 51 significant gene-biomarker relationships (**Tables S5A, S5B**). For the gene-  
101 biomarker relationships that were significant only in the pan-ancestry analysis, we did not  
102 observe a significant difference in the estimated effect size between the European-only and  
103 the pan-ancestry analyses ( $p=0.83$ ), suggesting that increased statistical power rather than  
104 ancestry-specific effects is the more likely reason why these associations were identified in  
105 the pan-ancestry analysis. One such association detected exclusively in the pan-ancestry  
106 analysis was between recessive carriers of nonsynonymous variants in the membrane  
107 transport gene *SYT7* and blood creatinine levels (number of QV carriers=5,  $\beta=2.17$   
108 [1.46,2.87],  $p=1.6 \times 10^{-9}$ ). With 3 of the 5 carriers observed in the South Asian and African  
109 ancestry participants, the pan-ancestry analysis facilitated detection of this association,  
110 which was not study-wide significant in the European subset (number of QV carriers=2,  
111  $\beta=1.17$  [0.06,2.28],  $p=0.04$ ). Remarkably consistent with the biomarker findings,  
112 recessive carriers of *SYT7* PTVs demonstrate a increased risk of glomerular disease in the

113 pan-ancestry analysis (OR=92.1 [12.1,713.2],  $p=2.6 \times 10^{-5}$ ), but the clinical association on its  
114 own is not yet study-wide significant.

115 The significant gene-level relationships from the collapsing analyses encompassed  
116 207 distinct genes, of which 32 were associated with biomarkers across different biological  
117 classes (**Figure 3c**). This includes *GIGYF1*, a tyrosine kinase receptor signalling protein, in  
118 which rare PTVs were associated with biomarkers of glucose [glucose (beta=0.59  
119 [0.42,0.76],  $p=7.9 \times 10^{-12}$ ) and HbA1c (beta=0.73 [0.57,0.88],  $p=4.5 \times 10^{-20}$ )] and cholesterol  
120 metabolism [total cholesterol (beta=-0.66 [-0.82,-0.50],  $p=2.0 \times 10^{-15}$ ), LDL-cholesterol (beta=-  
121 0.61 [-0.78,-0.45],  $p=3.4 \times 10^{-13}$ ) and apolipoprotein B (beta=-0.60 [-0.77,-0.44],  $p=1.3 \times 10^{-12}$ )].  
122 Additionally, among clinical traits documented in the UKB<sup>20</sup>, significant associations were  
123 observed for rare PTVs in *GIGYF1* with the risk of hypothyroidism (OR=4.2 [2.7,6.6],  
124  $p=7.1 \times 10^{-9}$ ) and type 2 diabetes (OR=4.0 [2.7,5.8],  $p=1.0 \times 10^{-10}$ ). Since hypothyroidism is  
125 known to raise LDL-cholesterol levels, we subsequently tested the *GIGYF1*-LDL-cholesterol  
126 association adjusted for a diagnosis of hypothyroidism. The signal between *GIGYF1* PTVs  
127 and LDL-cholesterol (adjusted for the effect of statins) remained significant upon adjusting  
128 for hypothyroidism (beta=-0.55 [-0.71,-0.38];  $p=6.2 \times 10^{-11}$ ), suggesting that the *GIGYF1* locus  
129 likely influences cholesterol levels independent of solely thyroid hormone-mediated  
130 pathways. Thus, by leveraging information from over 400,000 UKB exomes, our study  
131 provides a more comprehensive picture regarding *GIGYF1*'s biomarker fingerprint and  
132 associated clinical traits, expanding on previously reported common<sup>7</sup> and rare variant  
133 associations<sup>21,22</sup> at this locus.

134 We observed that adjusting biomarkers for medications that influence their levels can  
135 also improve detection of associations: 31/84 (37%) significant gene-biomarker relationships  
136 for apolipoprotein B, LDL-cholesterol, total cholesterol, and urate from the collapsing  
137 analysis were detected only after we adjusted their values for commonly prescribed  
138 medications (**Table S4A**). This includes association between putatively damaging missense  
139 variants and PTVs in *HMGCR* ("flexdmg" model) and LDL-cholesterol (medication-adjusted:  
140 beta=-0.19 and  $p=1.7 \times 10^{-11}$ ; medication-unadjusted: beta=-0.15 and  $p=6.1 \times 10^{-8}$ ), which

141 validates the value of medication adjustment to untangle the effects of therapeutic  
 142 intervention vs natural aberration of *HMGCR*. Moreover, for gene-biomarker relationships  
 143 that were significantly associated in both the medication-unadjusted and the medication-  
 144 adjusted analyses (N=52), the absolute effect sizes were observably higher in the latter  
 145 (**Figure S2**), but the difference was not statistically significant in the current sample (Mann  
 146 Whitney  $p=0.28$ ).

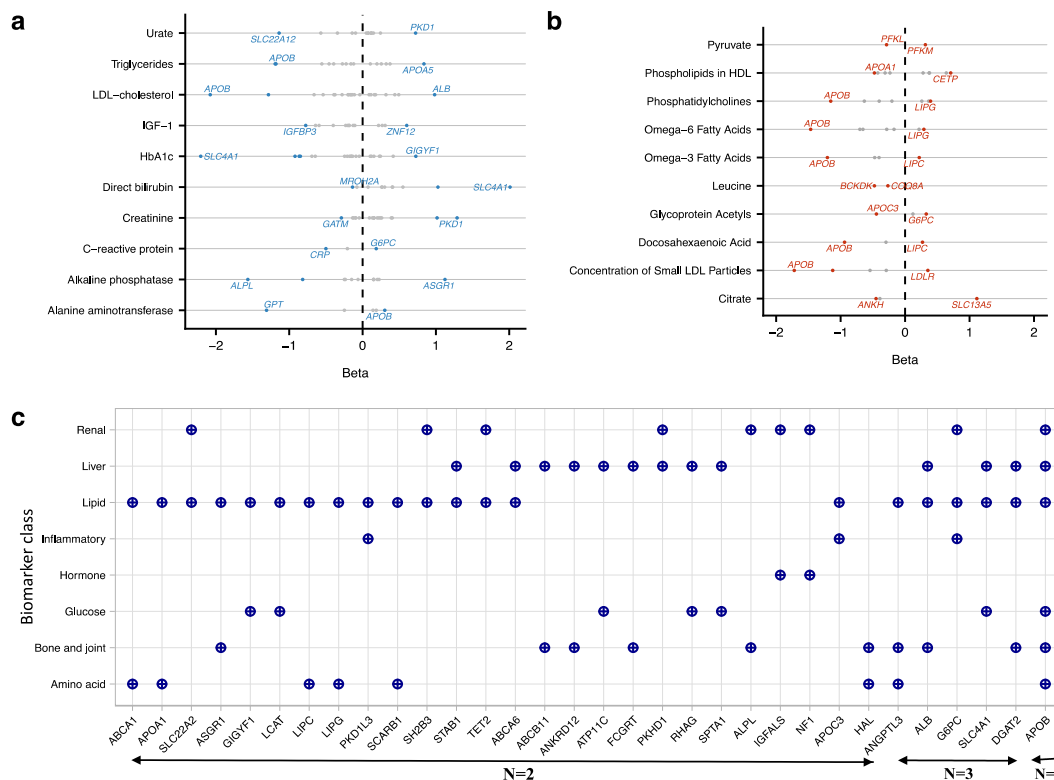

147 **Figure 3: Significant relationships between genes and metabolic blood biomarkers**  
 148 **identified in the collapsing analysis**  
 149 (a, b) Significant gene relationships ( $p < 1 \times 10^{-8}$ ) identified for select clinical biomarkers and metabolites  
 150 in the collapsing analysis have been shown. The genes with the highest absolute effect sizes for each  
 151 have been labelled.  
 152 (c) The plot lists the 32 genes that were significantly associated ( $p < 1 \times 10^{-8}$ ) with metabolic biomarkers  
 153 across two or more biological classes in the collapsing analysis. For each such gene, the  
 154 corresponding biological classes have been indicated.

156  
 157 **Gene-level collapsing analysis: capturing allelic series**

158 We observed that 17% (215/1,303) of significant relationships between genes and  
 159 metabolic biomarkers from the collapsing analysis did not achieve significance in the  
 160 respective variant-level ExWAS (**Table S6**). Next, we also compared the gene-biomarker  
 161 relationships that achieved significance in the collapsing analysis (**Tables S4A, S7**) and the



162 microarray-based GWAS<sup>14</sup> (as per a less stringent significance threshold:  $p < 1 \times 10^{-7}$ ) for the  
163 32 biomarkers (28 blood and 4 urinary biomarkers) analysed in both studies. Of the  
164 significant gene-biomarker relationships identified in the collapsing analysis, 40% (142/357)  
165 were not detected in the microarray-based GWAS (**Table S8**). These include associations  
166 for well-known drug target genes such as *HMGCR* (with LDL-cholesterol) and *PPARG* (with  
167 HDL-cholesterol). Furthermore, the effect size estimates were significantly higher in the  
168 collapsing analysis than in microarray-based GWAS for 215 gene-biomarker relationships  
169 detected via both approaches (Mann-Whitney  $p = 8.0 \times 10^{-6}$ ) (**Table S9; Figure 4b**). One likely  
170 explanation for this is that by testing aggregate effects of rare putative functional variants in  
171 a gene, associations arising from collapsing analysis are enriched for larger effects (**Figure**  
172 **4c**). Collectively, these results highlight that application of a gene-based rare variant  
173 collapsing analysis to large-scale exome sequencing can increase power to capture  
174 associations that are driven by an allelic series, and thus expand our understanding of the  
175 genetic architecture of traits, especially where a lot of success has already been achieved  
176 through traditional microarray-based GWAS.

177 *SLC4A1*, which encodes a chloride/bicarbonate anion exchange protein in the red cell  
178 membrane, represents one such gene for which multiple signals were detected in the gene-  
179 level collapsing analysis but not in the ExWAS. We observed 32 carriers for 28 distinct *SLC4A1*  
180 PTVs, of which 25 (89%) were private (i.e., observed in a single carrier) (**Figure S3**). Overall,  
181 *SLC4A1* PTVs were significantly associated with a strong reduction in HbA1c (beta=-2.2 [-2.6,-  
182 1.8],  $p = 1.4 \times 10^{-25}$ ) and LDL-cholesterol (beta=-1.0 [-1.4,-0.7],  $p = 8.0 \times 10^{-9}$ ), while also showing  
183 strong increases in total bilirubin (beta=1.7 [1.3,2.0],  $p = 1.1 \times 10^{-22}$ ) and direct bilirubin  
184 (beta=2.0 [1.7,2.4],  $p = 1.8 \times 10^{-28}$ ). Among clinical phenotypes, *SLC4A1* PTVs are significantly  
185 associated with disorders of reduced red cell membrane stability such as hereditary  
186 spherocytosis and hereditary haemolytic anaemia, but not with any phenotype related to  
187 glucose or lipid metabolism ( $p < 1 \times 10^{-5}$ ). Similarly, in ClinVar, several missense and loss-of-

188 function mutations in this gene are reported as pathogenic for hereditary spherocytosis.  
189 Therefore, we further tested the *SLC4A1*–biomarker associations after adjusting for the  
190 diagnosis of hereditary spherocytosis or hereditary haemolytic anaemia and relevant blood  
191 cell indices, including red cell distribution width (RDW) and mean corpuscular haemoglobin

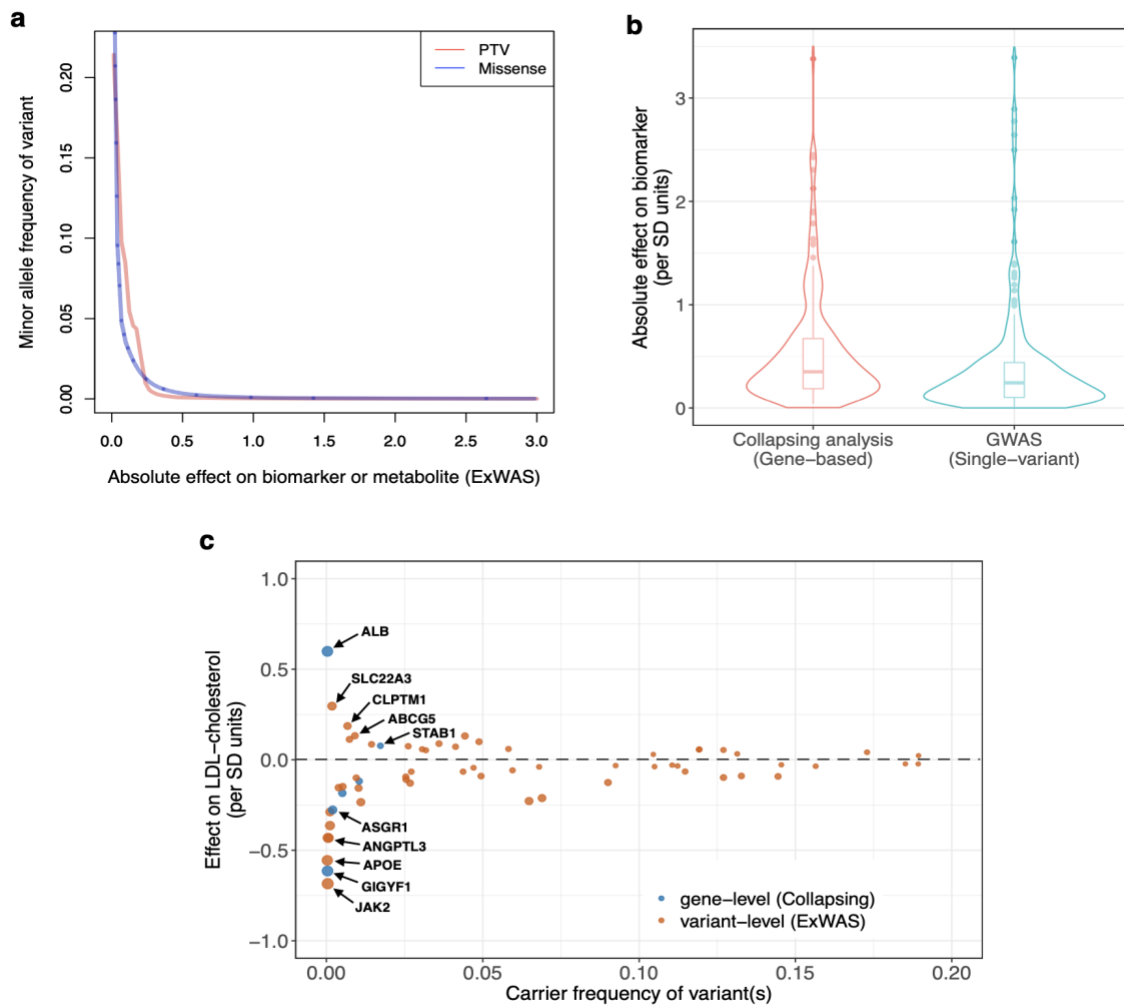

192  
193  
194  
195  
196  
197  
198  
199  
200  
201  
202  
203  
204  
205  
206

#### Figure 4: Effects of coding variants on metabolic blood biomarkers

(a) Absolute effect sizes for missense variants and PTVs significantly associated ( $p < 1 \times 10^{-8}$ ) with metabolic biomarkers in the single variant analysis (ExWAS) as a function of their minor allele frequency (in cases where a missense variant or a PTV was significantly associated with more than one biomarker, the association with the highest absolute effect size was selected). (b) The effect sizes estimated in the gene-based collapsing analysis and the Sinnott-Armstrong *et al* microarray-based GWAS<sup>14</sup> were compared for the gene-biomarker relationships that were significantly associated in both ( $N=215$ ). For each significant gene-biomarker relationship, the collapsing model (from the collapsing analysis) and the individual variant (from the microarray-based GWAS) with the highest absolute effect sizes were selected. The effect sizes estimated in the collapsing analysis were significantly higher than that in the GWAS (Mann-Whitney  $p=8.0 \times 10^{-6}$ ). (c) Comparing effect sizes for individual variants and aggregate of rare variants (in a gene) that were significantly associated ( $p < 1 \times 10^{-8}$ ) with LDL-cholesterol. Some examples of genes significantly associated with LDL-cholesterol have been highlighted. The Y-axis has been capped at 1 SD units for visual clarity.

207  
208 concentration (MCHC). The gene-based *SLC4A1* PTV signals remained significant in the  
209 adjusted analyses (**Table S10**). Although PTVs in this gene may be independently associated  
210 with biomarkers of glucose, lipid and bilirubin metabolism, we cannot rule out the  
211 possibility of under-reporting of hereditary spherocytosis and hereditary haemolytic  
212 anaemia in the UKB that explains these observations. The *SLC4A1* enigma is consistent with  
213 previous reports of other red blood cell loci that have also been significantly associated with  
214 HbA1c<sup>23</sup>.

### 215 **Gene-SCOUT: estimating gene similarity based on cohort statistics from collapsing analysis**

216 We considered the opportunity to leverage this new and rich catalogue of gene-level  
217 association statistics from the collapsing analysis to determine genes with similar biomarker  
218 fingerprints. To achieve this, we developed a gene similarity tool 'Gene-SCOUT'<sup>24</sup>, that  
219 solely uses the gene-level collapsing analysis statistics across the studied biomarkers to  
220 identify genes with the most comparable biomarker genetic associations as a given gene of  
221 interest. No other information is used in constructing the gene similarity scores. Since this  
222 tool estimates gene similarity for an index gene by selecting features based on the  
223 significance cut-off of  $p < 1 \times 10^{-5}$ , gene neighbours could not be determined for genes that did  
224 not achieve association  $p < 1 \times 10^{-5}$  with any biomarker feature. Accordingly, for our feature set  
225 comprising of 198 biomarkers, we were able to determine gene similarity for 3%  
226 (536/18,762) of human protein-coding genes. To illustrate Gene-SCOUT's application, we  
227 selected the 24 genes that were significantly associated ( $p < 1 \times 10^{-8}$ ) with LDL-cholesterol in  
228 the collapsing analysis. We used each gene in this set as a seed gene to construct a  
229 network figure that demonstrates their respective gene neighbours (**Figure 5**). Using *APOB*  
230 as an example, we observe that genes with the most comparable biomarker fingerprint as  
231 *APOB* include: *ABCA1*, *ACVR1*, *APOC3*, *ANGPTL3*, *ASGR1*, *ASXL1*, *BTNL9*, *GIGYF1*,  
232 *HIST2H2BE*, *HMGCR*, *NPC1L1*, *PCSK9*, *PDE3B*, *PKD1L3*, *RRBP1*, *SLC4A1*, *TM6SF2* and  
233 *ZNF229*. For some of these genes (e.g., *ZNF229*, *ACVR1*), the links with lipid metabolism

234 appear to be novel, in addition to the recently described relationships for *GIGYF1*<sup>21,22</sup>.  
235 Inhibition of *APOB*, such as through mipomersen, is known to be clinically effective in  
236 reducing blood cholesterol levels. Remarkably, 5 (namely, *APOC3*, *ANGPTL3*, *HMGCR*,  
237 *NPC1L1* and *PCSK9*) of the 18 genes (28%) determined to have similar cohort-level genetic  
238 associations with biomarkers as *APOB* are also targets of lipid-lowering drugs that are already  
239 approved or in various stages of development (<https://www.fda.gov/drugs>).

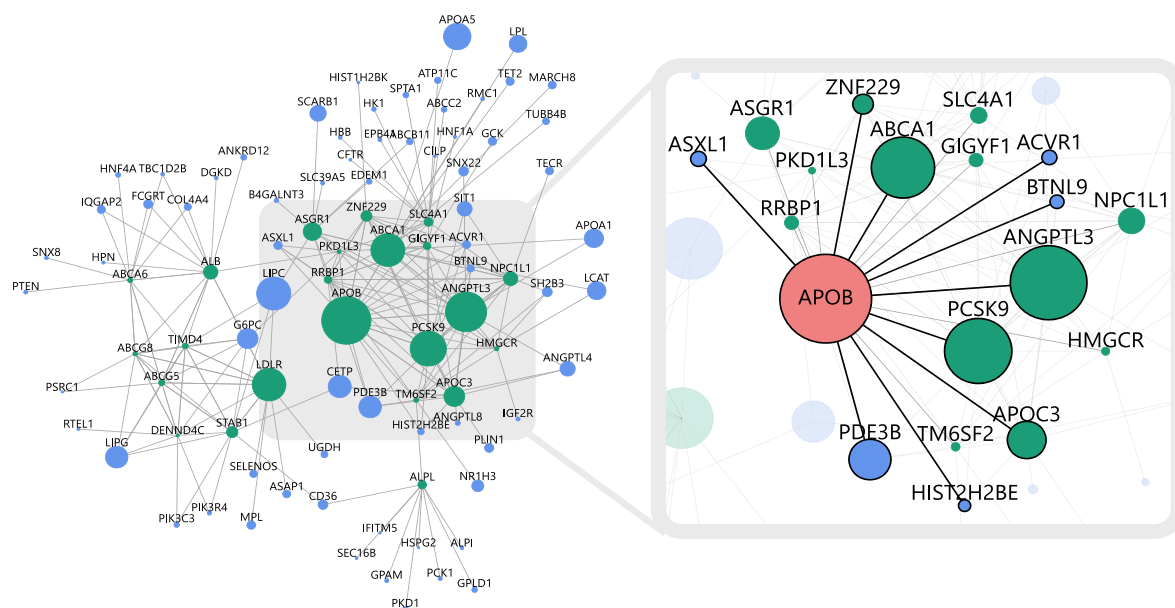

240  
241 **Figure 5: Network figure demonstrating the gene neighbours i.e., genes with most**  
242 **similar biomarker genetic signals, as the set of genes that were significantly**  
243 **associated with LDL-cholesterol in the collapsing analysis**  
244 The 24 genes that were significantly associated ( $p < 1 \times 10^{-8}$ ) with LDL-cholesterol in the collapsing  
245 analysis were used as seed genes (green nodes) to construct a network figure demonstrating  
246 respective gene neighbours (edges). Non-seed genes are represented using blue nodes. The size of  
247 a gene node corresponds to the number of features (of total 198) that the gene is associated with  
248 at  $p < 1 \times 10^{-5}$ . The inset demonstrates the genes with most similar biomarker signature as *APOB* – these  
249 include the ten closest genes for *APOB* as the seed gene (black edges) and other seed genes that  
250 have *APOB* among their ten closest genes (grey edges).

## 251 Discussion

252 We used the 454,796 UK Biobank exome sequences to explore the contribution of private-to-  
253 rare-to-common protein-coding variation for 30 clinical biomarkers and 168 metabolite  
254 measurements. By adopting variant- and gene-level analysis frameworks and assessing the  
255 full allelic frequency spectrum, we have expanded our understanding of the genetic  
256 architecture of metabolic biomarkers that have previously been studied through microarray  
257 data. The finding that 17% of gene-biomarker relationships detected in the gene-level  
258 collapsing analysis were not identified in the single variant analysis demonstrates the power  
259 of testing an aggregate effect of rare variants in a gene encompassing a range of genetic  
260 architectures. We also illustrated how adjusting biomarker values for commonly prescribed  
261 medications can improve signal detection.

262 There are several strengths of our study that might have implications for identifying or  
263 validating drug targets. First, by virtue of focusing on coding variants, the observed  
264 associations could provide a more causal link between a gene and a blood biomarker<sup>25–28</sup>.  
265 Moreover, association signals emerging from collapsing analysis are driven by an aggregate  
266 effect of multiple rare variants (allelic series) that tend to be less impacted by local LD  
267 structure. This contrasts with associations identified in microarray-based GWAS that often  
268 map to non-coding regions of the genome or to regions of extensive LD, making it more  
269 challenging to pinpoint the underlying causal variants.

270 Associations involving putative functional variants can also indicate the desired  
271 modulation of the target gene e.g., upregulation or downregulation of the target gene  
272 product, required to mitigate the risk of the disease related to the associated biomarker. For  
273 instance, we observed a total of 182 associations for rare (MAF<0.1%) PTVs with the 30  
274 blood biomarkers, which is >3-fold more than the 53 conditionally independent PTV  
275 associations (for the same set of blood biomarkers) reported in the microarray-based  
276 analysis<sup>14</sup>.

277 We also introduce a novel tool (Gene-SCOUT) that utilises all the gene-level  
278 collapsing analysis statistics across the 198 studied biomarkers to estimate a ‘similarity’  
279 metric between genes. With the aid of specific examples, we were able to demonstrate that  
280 this approach can successfully identify genes with similar biomarker fingerprints.

281 While there are certain advantages of using blood biomarkers to dissect the genetics  
282 of complex human diseases, including greater statistical power offered by quantitative traits  
283 and better insights into biological pathways underlying associations, further work is  
284 necessary to establish the causal relationship between genetic loci identified using  
285 biomarkers or metabolites and the related disease(s). For instance, we observed  
286 associations between certain biomarkers and variants in genes that encode them (e.g., *ALB*  
287 with albumin, and *CST3* with cystatin C) – although such associations serve as excellent  
288 positive controls that demonstrate the robustness of our analysis framework, they may not  
289 offer novel insights into disease pathophysiology.

290 Using the largest collection of exome sequences linked to a diverse set of circulating  
291 metabolic biomarkers, we demonstrate the value of this resource to enhance our  
292 understanding of human diseases, and potentially, provide novel therapeutic targets focused  
293 on mimicking natural human genetic discoveries. Our study also strongly supports the use of  
294 a gene-based collapsing framework to uncover gene-biomarker relationships that are driven  
295 by an aggregate effect of multiple rare, non-synonymous variants.

296

## 297 **Methods**

298

### 299 **UK Biobank (UKB) Resource**

300 The UKB resource<sup>13</sup> is a prospective cohort study of ~500,000 individuals from across the  
301 United Kingdom, aged between 40 and 69 years. The average age at recruitment for the  
302 sequenced participants was 56.5 years and 54% of the sequenced cohort are females.  
303 Participant data, obtained through questionnaires and assessment visits, include health  
304 records that are periodically updated by the UKB, self-report survey information, linkage to  
305 death and cancer registries, urine and blood biomarkers, imaging data, accelerometer data  
306 and various other phenotypic endpoints<sup>13</sup>. All study participants provided informed consent.  
307 For this study, data from the UKB resource was accessed under the application number  
308 26041.

309

### 310 **Metabolic blood biomarkers**

311 Routine clinical blood biomarkers related to glucose and lipid metabolism, renal and liver  
312 function, among others (N=30), were measured in the majority of the ~500,000 UKB  
313 participants (**Table S1A**). Additionally, 168 blood metabolites, including lipoprotein lipids,  
314 fatty acids and their compositions, and various low-molecular weight metabolites, were  
315 profiled in a subset of ~120,000 UKB participants by Nightingale Health using nuclear  
316 magnetic resonance spectroscopy<sup>17</sup> (**Table S1B**). Samples with a 'quality control (QC) flag'  
317 for the blood metabolites were excluded. In total, we analysed 198 metabolic blood  
318 measures: 30 clinical biomarkers and 168 metabolites. We applied rank-based inverse-  
319 normal transformation to the measurements prior to performing association analyses.

320 For four blood biomarkers (LDL-cholesterol, total cholesterol, apolipoprotein B and  
321 urate) we adjusted for the effect of commonly prescribed medications known to influence  
322 their levels. For LDL-cholesterol, total cholesterol and apolipoprotein B, we adjusted for the  
323 effect of statins based on their 'statin adjustment factors', previously estimated in the UKB as  
324 0.684, 0.749 and 0.719, respectively<sup>14</sup>. Similarly, we adjusted urate for the effect of

325 allopurinol based on an ‘allopurinol adjustment factor (0.810)’, calculated using an approach  
326 identical to that described for statins<sup>14</sup>.

327

### 328 **Whole-exome sequencing and bioinformatics pipeline**

329 Whole-exome sequences for 454,988 UKB participants were generated at the Regeneron  
330 Genetics Center as part of a pre-competitive data generation collaboration between AbbVie,  
331 Alnylam Pharmaceuticals, AstraZeneca, Biogen, Bristol-Myers Squibb, Pfizer, Regeneron  
332 and Takeda<sup>29</sup>. The exome sequencing procedure and the relevant QC steps have been  
333 detailed previously in Szustakowski *et al* (2021)<sup>29</sup> and Wang *et al* (2021)<sup>20</sup>. The FASTQ  
334 sequences that were made available were first aligned, following which, single nucleotide  
335 variants (SNVs) and small indels were called using Illumina’s DRAGEN Bio-IT Platform  
336 Germline Pipeline v3.0.7 on the Amazon Web Services cloud compute platform available at  
337 AstraZeneca’s Centre for Genomics Research. SNPEff v4.3<sup>30</sup> was used to annotate the  
338 ‘most damaging effect’ predicted for each protein coding variant. In addition, we used certain  
339 other bioinformatic tools such as missense tolerance ratio (MTR) scores<sup>31</sup> to identify regions  
340 of protein coding genes under constraint for missense variants, and REVEL<sup>32</sup> to prioritise  
341 coding variants based on their predicted deleteriousness. Further details on how these tools  
342 were applied to the UKB exome sequencing dataset have been previously described<sup>20</sup>.

343

### 344 **Selection of UKB samples for the association analyses**

345 Prior to performing the association analyses, we excluded samples from the available UKB  
346 exome sequencing dataset (N=454,796) based on the following QC measures<sup>20</sup> (**Figure S4**):  
347 (i) *DNA contamination*: VerifyBAMID freemix (measure of DNA contamination) >4%.  
348 (ii) *Coverage depth*:  $\geq 10x$  for <94.5% of the consensus coding sequence (CCDS release  
349 22).  
350 (iii) *Relatedness*: 2<sup>nd</sup>-degree relatives or closer (equivalent to kinship coefficient >0.0884), as  
351 estimated using the --kinship function in KING v2.2.2<sup>33</sup>.

352 Additionally, to perform analyses accounting for differing genetic ancestry, we  
353 assigned samples to one of the four major ancestral groups (minimum 1,000 participants):



354 European (N=394,695), South Asian (N=8,078), East Asian (N=2,209) and African  
355 (N=7,412). This was done by excluding participants: (i) with predicted genetic ancestry  
356 <0.99 (for European ancestry) or <0.95 (for the remaining ancestries), as estimated using  
357 PEDDY v0.4.2; or (ii) lying outside four standard deviations for the top four principal  
358 components for each of the genetic ancestry collections.

### 359 **Association analysis for metabolic blood biomarkers**

361 A number of stringent variant-level QC steps, detailed previously<sup>20</sup>, were applied to select  
362 variant calls with highest confidence for association testing. Briefly, the variant-level QC  
363 criteria included coverage depth, genotype and mapping quality scores, DRAGEN variant  
364 status, read position rank sum score (RPRS), mapping quality rank sum score (MQRS),  
365 alternate allele read proportion for heterozygous calls, proportion of samples failing any of  
366 these QC criteria, and gnomAD-related filters.

367 Association testing between the metabolic blood biomarkers and the variants in the  
368 exome sequencing dataset was conducted using two complementary analytical approaches  
369 **(Figure 1)**:

- 370 (i) Single variant exome-wide association study (ExWAS)
- 371 (ii) Gene-level collapsing analysis

372 We conducted the association analyses separately in the European ancestry  
373 participants as this comprised the single largest ancestral group in this resource and for all  
374 four ancestries combined ('pan-ancestry' analysis).

#### 375 Single variant exome-wide association study (ExWAS)

377 In the single-variant analysis (hereafter referred to as 'ExWAS'), variants that passed the QC  
378 steps were filtered further to include those that had a minimum of six carriers (equivalent to  
379 MAF>0.0008% in the European ancestry subset). We additionally excluded variants that had  
380 one of the following annotations as their most damaging effect as per SNPEff:

381 *3\_prime\_UTR, 5\_prime\_UTR, initiator\_codon\_variant, non\_coding\_transcript\_exon\_variant,*

382 and *synonymous\_variant*. The remaining non-synonymous coding variants (N=2,043,019 in  
383 the European ancestry subset) were used to perform the ExWAS.

384 The ExWAS was conducted by fitting a linear regression model adjusted for age, sex  
385 and BMI (for blood metabolites only), using the tool PEACOK that was developed as a  
386 modification of the R package PHESANT<sup>34</sup>. For the pan-ancestry analysis, we additionally  
387 included the categorical ancestral group and top five ancestry principal components as  
388 covariates. For each of the 198 biomarkers, three different genetic models were evaluated in  
389 the ExWAS: (i) genotypic (AA vs AB vs BB), (ii) dominant (AA+AB vs BB), and (iii) recessive  
390 (AA vs AB+BB), where A and B denote the reference and alternative alleles, respectively. A  
391 significance cut-off of  $p < 1 \times 10^{-8}$  was adopted for the ExWAS<sup>35</sup>.

#### 392 Gene-level collapsing analysis 393

394 In order to boost power to detect associations for rare variants (including private mutations)  
395 having the same direction of effect, we adopted a collapsing framework to test the aggregate  
396 effect of rare functional variants in a gene. Overall, 10 different collapsing models (9  
397 dominant and one recessive) were implemented per gene to evaluate a range of genetic  
398 architectures. Additionally, a synonymous collapsing model was used for the purpose of  
399 establishing an empirical negative control<sup>20</sup>.

400 As outlined in **Table S11**, the criteria for qualifying variants (QVs)<sup>36</sup> for the collapsing  
401 models were based on the following parameters: type of variant (missense, non-  
402 synonymous or PTV), minor allele frequency, *in silico* deleteriousness predictors (REVEL  
403 and MTR), and type of genetic model (dominant or recessive). The following variant  
404 annotations were used to define PTVs: *exon\_loss\_variant*, *frameshift\_variant*, *start\_lost*,  
405 *stop\_gained*, *stop\_lost*, *splice\_acceptor\_variant*, *splice\_donor\_variant*, *gene\_fusion*,  
406 *bidirectional\_gene\_fusion*, *rare\_amino\_acid\_variant* and *transcript\_ablation*. Hemizygous  
407 genotypes for the X chromosome also qualified for the recessive model.

408 For a given collapsing model, the effect of QVs in each gene (N=18,762) was  
409 calculated as the difference in the mean of a blood biomarker between carriers and non-

410 carriers of the QVs, using a linear regression model in PEACOCK. Covariates used in the  
411 linear regression model were identical to that described for the ExWAS.

412 A significance cut-off of  $p < 1 \times 10^{-8}$  was set for the collapsing analysis based on the  
413 observed p-value distribution for the synonymous model and an n-of-1 permutation, as  
414 described previously<sup>20</sup>.

#### 415 **Association analysis of clinical phenotypes documented in the UKB**

417 We harmonized and union mapped the clinical phenotypes available in the UKB, as previously  
418 described<sup>20</sup>. Phenome-wide collapsing analysis for 15,719 clinical phenotypes was performed  
419 for the 11 collapsing models, as described in our previously published study<sup>20</sup>. We queried the  
420 results of this analysis for genes of interest that emerged from the analysis of the metabolic  
421 biomarkers.

422 Additionally, we also performed an association analysis between the each of the 198 metabolic  
423 biomarkers and the clinical phenotypes using a linear regression model adjusted for age and  
424 sex.

#### 425 **Comparison of results from collapsing analyses to microarray-based genome-wide** 426 **association study**

427 We explored the hypothesis that the application of a collapsing framework – that tests the  
428 aggregate effect of rare functional variants in a gene identified using exome sequencing –  
429 detected gene-biomarker relationships that were previously not identified in microarray-  
430 based studies. In order to do that, we compared our findings with the results from a recent  
431 study<sup>14</sup> that conducted single variant association analysis (GWAS) for clinical biomarkers in  
432 the UKB using microarray data, including directly genotyped coding variants. Besides the  
433 28/30 clinical blood biomarkers that we studied, seven other biomarkers (mainly, urine-  
434 related) were analysed in the GWAS. These seven biomarkers comprised of four urinary  
435 biomarkers that were directly measured in the UKB and an additional three derived  
436 measurements. For the purpose of comparing findings, we additionally performed gene-level  
437 collapsing analysis for the four urinary biomarkers for which data were directly available in  
438

439 the UKB (i.e. ‘sodium in urine’, ‘potassium in urine’, ‘microalbumin in urine’, and ‘creatinine  
440 (enzymatic) in urine’). To be consistent with the microarray-based GWAS, we used the  
441 statin-adjusted values for LDL-cholesterol, total cholesterol, and apolipoprotein B, and the  
442 medication-unadjusted values for the remaining biomarkers. Thereafter, for the set of 32  
443 biomarkers (28 blood and 4 urinary biomarkers) common to both studies, we compared  
444 gene-biomarker relationships that achieved significance ( $p < 1 \times 10^{-8}$ ) in the collapsing analysis  
445 with gene-biomarker relationships corresponding to the significant coding variant  
446 associations reported in the GWAS. We considered a comparatively relaxed significance  
447 threshold of  $p = 1 \times 10^{-7}$  for the GWAS results in order to be stringent when attributing a gene-  
448 biomarker relationship as being specific to the collapsing analysis.

449 We also hypothesised that the various variant-level “purifying” filters implemented for  
450 QV selection in the collapsing analysis can enable a more direct estimate for the effect of  
451 gene aberrations (e.g., PTVs) on biomarker levels. To investigate this hypothesis, we  
452 compared the effect sizes for gene-biomarker relationships that achieved significance in both  
453 the gene-level collapsing analysis and the microarray-based GWAS. For each such gene-  
454 biomarker relationship, we selected: (i) the *model* with the highest absolute beta in the  
455 collapsing analysis, and (ii) the individual *variant* with the highest absolute beta as reported  
456 in the Sinnott-Armstrong *et al* GWAS<sup>14</sup>. For the latter, we adopted the absolute beta  
457 estimated in the genotypic model in our ExWAS (for the corresponding gene-biomarker  
458 relationship) as a substitute, to account for possible differences in trait transformation,  
459 association model or covariates between our study and the Sinnott-Armstrong *et al* GWAS.  
460 Nonetheless, the absolute betas were highly correlated between the Sinnott-Armstrong *et al*  
461 GWAS and our ExWAS (Spearman’s  $\rho = 0.99$ ) (**Figure S5**). We then compared the  
462 absolute beta of the collapsing model [step (i)] with that of the individual variant [step (ii)].  
463 This approach provides a means to compare the effect size of aberrations in genes on  
464 biomarker levels estimated from individual coding variants captured by microarrays with that  
465 estimated from an aggregate of rare coding variants identified using exome sequencing.  
466

## 467 **Estimating gene similarity based on association signatures from collapsing analysis**

468 We aimed to leverage the rich catalogue of gene-level association statistics from the  
469 collapsing analysis – ascertained for the set of studied metabolic biomarkers and under  
470 different QV models – to identify genes that possess similar metabolic biomarker fingerprint  
471 as a (target) gene of interest. Such a ‘gene similarity’ metric can provide opportunities to not  
472 only expand our understanding of gene networks, but also offer alternative candidates in  
473 cases of difficult-to-drug targets. Gene-SCOUT (Gene Similarity from Continuous Traits)<sup>24</sup>,  
474 the tool that we developed for this purpose, can also estimate “similarity” between genes  
475 based on any set of quantitative traits of interest.

476 Rather than calculating similarities between genes directly, Gene-SCOUT estimates  
477 distances between genes, which it then uses as a proxy for their similarity. Based on that,  
478 the set of genes having the smallest distance from a given seed gene represent those that  
479 are most ‘similar’ to it. We applied the cosine distance method – which is commonly used in  
480 natural language processing<sup>37</sup> – to calculate distances between genes<sup>38</sup> based on their  
481 effects on the metabolic biomarkers (referred to as ‘features’) estimated in the collapsing  
482 analysis. In order to minimise the impact of stochastic effects on the gene similarity  
483 estimations, for a given seed gene of interest, only those features that the genes is  
484 associated with at  $p < 1 \times 10^{-5}$  are selected (‘feature selection’ step), guided by sensitivity  
485 analyses performed for a range of p-value thresholds<sup>24</sup>. Thus, distances from genes having  
486  $p > 1 \times 10^{-5}$  for all features in common with the seed gene are not considered.

487 The feature set used to generate the Gene-SCOUT results comprised of the 198  
488 metabolic blood biomarkers. Though there is a degree of correlation in our feature set  
489 (**Figure 2a**), we have demonstrated through simulations that correlation between features  
490 has minimal impact on gene similarity estimations<sup>24</sup>.  
491 To illustrate the tool’s utility, we generated a network figure showing the genes that were  
492 most similar to each of the 24 genes that were significantly associated with LDL-cholesterol  
493 in the collapsing analysis.

494 **Ethics Reporting**

495 The protocols for UKB are overseen by The UK Biobank Ethics Advisory Committee (EAC);  
496 for more information see: <https://www.ukbiobank.ac.uk/ethics/> and  
497 <https://www.ukbiobank.ac.uk/wp-content/uploads/2011/05/EGF20082.pdf>.

498  
499 **Acknowledgements**

500 We thank the participants and investigators in the UKB study who made this work possible  
501 (Resource Application Number 26041); the UKB Exome Sequencing Consortium (UKB-ESC)  
502 members AbbVie, Alnylam Pharmaceuticals, AstraZeneca, Biogen, Bristol-Myers Squibb,  
503 Pfizer, Regeneron and Takeda for funding the generation of the exome sequence data; the  
504 Regeneron Genetics Center for completing the sequencing and initial quality control of the  
505 exome sequencing data; and the AstraZeneca Centre for Genomics Research Analytics and  
506 Informatics team for processing and analysis of sequencing data.

507  
508 **Author Contributions**

509 S.P. designed the study. A.N., L.M., R.S.D., D.V., E.W., Q.W. and S.P. performed the  
510 analyses and statistical interpretation. A.N., R.S.D., A.R.H. and S.P. drafted the manuscript.  
511 All authors contributed to the review and critical revision of the manuscript.

512  
513 **Competing interests**

514 A.N., L.M., R.S.D., D.V., E.W., E.L.A., A.R., K.C., K.R.S., Q.W., B.C., D.S.P., A.R.H. and  
515 S.P. are current employees and/or stockholders of AstraZeneca.

## References

- 516 1. Willer, C. J. *et al.* Discovery and refinement of loci associated with lipid levels. *Nature*  
517 *genetics* **45**, (2013).
- 518 2. Wuttke, M. *et al.* A catalog of genetic loci associated with kidney function from  
519 analyses of a million individuals. *Nature genetics* **51**, (2019).
- 520 3. Kettunen, J. *et al.* Genome-wide association study identifies multiple loci influencing  
521 human serum metabolite levels. *Nature genetics* **44**, (2012).
- 522 4. Yet, I. *et al.* Genetic Influences on Metabolite Levels: A Comparison across  
523 Metabolomic Platforms. *PloS one* **11**, (2016).
- 524 5. Suhre, K. *et al.* A genome-wide association study of metabolic traits in human urine.  
525 *Nature genetics* **43**, (2011).
- 526 6. Shin, S.-Y. *et al.* An atlas of genetic influences on human blood metabolites. *Nature*  
527 *genetics* **46**, (2014).
- 528 7. Klarin, D. *et al.* Genetics of blood lipids among ~300,000 multi-ethnic participants of  
529 the Million Veteran Program. *Nature genetics* **50**, (2018).
- 530 8. Chambers, J. C. *et al.* Genome-wide association study identifies loci influencing  
531 concentrations of liver enzymes in plasma. *Nature genetics* **43**, (2011).
- 532 9. Prins, B. P. *et al.* Genome-wide analysis of health-related biomarkers in the UK  
533 Household Longitudinal Study reveals novel associations. *Scientific reports* **7**, (2017).
- 534 10. Wheeler, E. *et al.* Impact of common genetic determinants of Hemoglobin A1c on type  
535 2 diabetes risk and diagnosis in ancestrally diverse populations: A transethnic  
536 genome-wide meta-analysis. *PLoS medicine* **14**, (2017).
- 537 11. Long, T. *et al.* Whole-genome sequencing identifies common-to-rare variants  
538 associated with human blood metabolites. *Nature genetics* **49**, (2017).
- 539 12. Gallagher, M. D. & Chen-Plotkin, A. S. The Post-GWAS Era: From Association to  
540 Function. *American journal of human genetics* **102**, (2018).
- 541 13. Bycroft, C. *et al.* The UK Biobank resource with deep phenotyping and genomic data.  
542 *Nature* **562**, 203–209 (2018).
- 543 14. Sinnott-Armstrong, N. *et al.* Genetics of 35 blood and urine biomarkers in the UK  
544 Biobank. *Nature genetics* **53**, (2021).
- 545 15. UK10K Consortium *et al.* The UK10K project identifies rare variants in health and  
546 disease. *Nature* **526**, (2015).
- 547 16. MacArthur, D. G. *et al.* A systematic survey of loss-of-function variants in human  
548 protein-coding genes. *Science (New York, N.Y.)* **335**, (2012).
- 549 17. Ritchie, S. C. *et al.* Quality control and removal of technical variation of NMR  
550 metabolic biomarker data in ~120,000 UK Biobank participants. *medRxiv*  
551 2021.09.24.21264079 (2021) doi:10.1101/2021.09.24.21264079.
- 552 18. Gandotra, S. *et al.* Perilipin deficiency and autosomal dominant partial lipodystrophy.  
553 *The New England journal of medicine* **364**, (2011).
- 554 19. Shin, G.-C., Kang, H. S., Lee, A. R. & Kim, K.-H. Hepatitis B virus-triggered  
555 autophagy targets TNFRSF10B/death receptor 5 for degradation to limit  
556 TNFSF10/TRAIL response. *Autophagy* **12**, (2016).
- 557 20. Wang, Q. *et al.* Rare variant contribution to human disease in 281,104 UK Biobank  
558 exomes. *Nature* (2021) doi:10.1038/s41586-021-03855-y.
- 559 21. Aimee M. Deaton *et al.* Gene-level analysis of rare variants in 379,066 whole exome  
560 sequences identifies an association of GIGYF1 loss of function with type 2 diabetes.  
561 *Scientific Reports* **11**, (2021).
- 562 22. Jurgens, S. J. *et al.* Rare Genetic Variation Underlying Human Diseases and Traits:  
563 Results from 200,000 Individuals in the UK Biobank. *bioRxiv* 2020.11.29.402495  
564 (2020) doi:10.1101/2020.11.29.402495.
- 565 23. Chen, J. *et al.* The trans-ancestral genomic architecture of glycemic traits. *Nature*  
566 *genetics* **53**, (2021).

- 567 24. Lawrence Middleton *et al.* Gene-SCOUT: identifying genes with similar continuous  
568 trait fingerprints from phenome-wide association analyses. *Nucleic Acids Res (in*  
569 *submission)* (2021).
- 570 25. Cohen, J. C., Boerwinkle, E., Mosley, T. H. & Hobbs, H. H. Sequence variations in  
571 PCSK9, low LDL, and protection against coronary heart disease. *The New England*  
572 *journal of medicine* **354**, (2006).
- 573 26. Abul-Husn, N. S. *et al.* A Protein-Truncating HSD17B13 Variant and Protection from  
574 Chronic Liver Disease. *The New England journal of medicine* **378**, (2018).
- 575 27. Akbari, P. *et al.* Sequencing of 640,000 exomes identifies GPR75 variants associated  
576 with protection from obesity. *Science (New York, N. Y.)* **373**, (2021).
- 577 28. Nag, A. *et al.* Human genetic evidence supports MAP3K15 inhibition as a therapeutic  
578 strategy for diabetes. *medRxiv* 2021.11.14.21266328 (2021)  
579 doi:10.1101/2021.11.14.21266328.
- 580 29. Szustakowski, J. D. *et al.* Advancing human genetics research and drug discovery  
581 through exome sequencing of the UK Biobank. *Nature genetics* **53**, (2021).
- 582 30. Cingolani, P. *et al.* A program for annotating and predicting the effects of single  
583 nucleotide polymorphisms, SnpEff: SNPs in the genome of *Drosophila melanogaster*  
584 strain w1118; iso-2; iso-3. *Fly* **6**, 80–92 (2012).
- 585 31. Traynelis, J. *et al.* Optimizing genomic medicine in epilepsy through a gene-  
586 customized approach to missense variant interpretation. *Genome research* **27**, 1715–  
587 1729 (2017).
- 588 32. Ioannidis, N. M. *et al.* REVEL: An Ensemble Method for Predicting the Pathogenicity  
589 of Rare Missense Variants. *American journal of human genetics* **99**, 877–885 (2016).
- 590 33. Manichaikul, A. *et al.* Robust relationship inference in genome-wide association  
591 studies. *Bioinformatics* **26**, (2010).
- 592 34. Millard, L. A. C., Davies, N. M., Gaunt, T. R., Davey Smith, G. & Tilling, K. Software  
593 Application Profile: PHEASANT: a tool for performing automated phenome scans in UK  
594 Biobank. *International journal of epidemiology* **47**, (2018).
- 595 35. Fadista, J., Manning, A. K., Florez, J. C. & Groop, L. The (in)famous GWAS P-value  
596 threshold revisited and updated for low-frequency variants. *European journal of*  
597 *human genetics : EJHG* **24**, (2016).
- 598 36. Petrovski, S. *et al.* An Exome Sequencing Study to Assess the Role of Rare Genetic  
599 Variation in Pulmonary Fibrosis. *American journal of respiratory and critical care*  
600 *medicine* **196**, (2017).
- 601 37. Huang A. Similarity Measures for Text Document Clustering. *NZCSRSC* (2008).
- 602 38. Kittipong Chomboon, Pasapitch Chujai, Pongsakorn Teerarassamee, Kittisak  
603 Kerdprasop & Nittaya Kerdprasop. An Empirical Study of Distance Metrics for k-  
604 Nearest Neighbor Algorithm. *Proceedings of the 3rd International Conference on*  
605 *Industrial Application Engineering* (2015).
- 606
